# Supplementary material
Source: Springer Nature journal article supplement (https://www.springermedizin.de/resource/supplementary/12913_2014_3510_MOESM2_ESM.pdf/9533076)
Supplement: MOESM2 [file 9533076]

| <u>Study</u>      | <u>Communication</u> | <u>Information</u> | <u>Medications</u> | <u>Education</u> | <u>Symptoms</u> | <u>Supports</u> | <u>Advanced Planning</u> | <u>Coordinating</u> | <u>Discharge Planning</u> | <u>Follow-Up</u> | <u>Total Domains</u> |
|-------------------|----------------------|--------------------|--------------------|------------------|-----------------|-----------------|--------------------------|---------------------|---------------------------|------------------|----------------------|
| Amarasingham 2013 | 0                    | 0                  | 0                  | 1                | 1               | 0               | 0                        | 0                   | 1                         | 1                | 4                    |
| Anderson 2005     | 0                    | 0                  | 0                  | 1                | 1               | 1               | 0                        | 0                   | 0                         | 0                | 3                    |
| Atienza 2004      | 0                    | 0                  | 0                  | 1                | 1               | 0               | 0                        | 1                   | 1                         | 1                | 5                    |
| Balaban 2008      | 1                    | 1                  | 1                  | 0                | 1               | 0               | 0                        | 1                   | 1                         | 1                | 7                    |
| Blue 2001         | 0                    | 0                  | 0                  | 1                | 1               | 1               | 0                        | 1                   | 0                         | 1                | 5                    |
| Bostrom 1996      | 0                    | 0                  | 0                  | 0                | 1               | 0               | 0                        | 0                   | 0                         | 0                | 1                    |
| Bourbeau 2003     | 0                    | 0                  | 0                  | 1                | 1               | 0               | 0                        | 0                   | 0                         | 0                | 2                    |
| Braun 2009        | 0                    | 0                  | 0                  | 0                | 1               | 0               | 0                        | 0                   | 0                         | 0                | 1                    |
| Brown 1997        | 0                    | 0                  | 0                  | 1                | 1               | 0               | 0                        | 1                   | 1                         | 1                | 5                    |
| Chaudry 2010      | 0                    | 0                  | 0                  | 1                | 1               | 0               | 0                        | 0                   | 0                         | 0                | 2                    |
| Cline 1998        | 0                    | 0                  | 0                  | 1                | 1               | 0               | 0                        | 1                   | 0                         | 1                | 4                    |
| Coleman 2006      | 1                    | 1                  | 1                  | 1                | 1               | 1               | 0                        | 1                   | 1                         | 0                | 8                    |
| Creason 2001      | 0                    | 0                  | 0                  | 1                | 1               | 0               | 0                        | 1                   | 0                         | 0                | 3                    |
| Dai 2003          | 0                    | 0                  | 0                  | 0                | 0               | 1               | 0                        | 1                   | 1                         | 0                | 3                    |
| DeBusk 2004       | 0                    | 0                  | 0                  | 1                | 1               | 0               | 0                        | 0                   | 0                         | 1                | 3                    |
| Dedhia 2009       | 0                    | 0                  | 1                  | 1                | 0               | 1               | 0                        | 0                   | 1                         | 0                | 4                    |
| Doughty 2002      | 0                    | 0                  | 0                  | 1                | 1               | 0               | 0                        | 1                   | 0                         | 1                | 4                    |
| Dudas 2001        | 0                    | 0                  | 1                  | 0                | 1               | 0               | 0                        | 0                   | 0                         | 0                | 2                    |
| Dunn 1994         | 0                    | 0                  | 0                  | 0                | 1               | 0               | 0                        | 0                   | 0                         | 0                | 1                    |
| Einstadter 1996   | 0                    | 0                  | 0                  | 0                | 1               | 0               | 0                        | 1                   | 1                         | 1                | 4                    |
| Ekman 1998        | 0                    | 0                  | 1                  | 1                | 1               | 0               | 0                        | 1                   | 0                         | 0                | 4                    |
| Evans 1993        | 0                    | 0                  | 0                  | 0                | 1               | 1               | 0                        | 1                   | 1                         | 0                | 4                    |
| Forster 2005      | 0                    | 0                  | 0                  | 0                | 1               | 0               | 0                        | 1                   | 1                         | 0                | 3                    |
| Garin 2012        | 0                    | 0                  | 0                  | 1                | 0               | 0               | 0                        | 0                   | 0                         | 0                | 1                    |
| Gillespie 2009    | 0                    | 1                  | 1                  | 1                | 0               | 0               | 0                        | 1                   | 0                         | 0                | 4                    |
| Gow 1999          | 0                    | 0                  | 0                  | 0                | 0               | 1               | 0                        | 1                   | 1                         | 0                | 3                    |
| Graham 2012       | 0                    | 0                  | 0                  | 0                | 1               | 0               | 0                        | 0                   | 0                         | 0                | 1                    |
| Harrison 2011     | 0                    | 0                  | 0                  | 0                | 1               | 0               | 0                        | 0                   | 0                         | 0                | 1                    |
| Hess 2010         | 0                    | 1                  | 0                  | 0                | 0               | 0               | 0                        | 0                   | 1                         | 0                | 2                    |
| Holland 2005      | 0                    | 0                  | 1                  | 1                | 0               | 0               | 0                        | 1                   | 0                         | 1                | 4                    |
| Houghton 1996     | 0                    | 0                  | 0                  | 0                | 0               | 0               | 0                        | 0                   | 1                         | 0                | 1                    |
| Jaarsma 1999      | 0                    | 0                  | 0                  | 1                | 1               | 0               | 0                        | 0                   | 1                         | 0                | 3                    |
| Jack 2009         | 1                    | 1                  | 1                  | 1                | 1               | 1               | 0                        | 1                   | 1                         | 0                | 8                    |
| Kasper 2002       | 0                    | 0                  | 0                  | 1                | 1               | 1               | 0                        | 1                   | 1                         | 0                | 5                    |
| Kimmelstiel 2004  | 0                    | 0                  | 1                  | 1                | 1               | 0               | 0                        | 1                   | 0                         | 1                | 5                    |
| Koehler 2009      | 0                    | 1                  | 1                  | 1                | 1               | 0               | 0                        | 0                   | 1                         | 0                | 5                    |
| Koelling 2005     | 0                    | 0                  | 0                  | 1                | 0               | 0               | 0                        | 0                   | 0                         | 0                | 1                    |
| Kramer 2007       | 0                    | 0                  | 1                  | 0                | 0               | 0               | 0                        | 0                   | 0                         | 0                | 1                    |
| Kwok 2004         | 0                    | 0                  | 0                  | 1                | 1               | 1               | 0                        | 0                   | 0                         | 1                | 4                    |
| Laramée 2003      | 0                    | 0                  | 1                  | 1                | 1               | 1               | 0                        | 1                   | 1                         | 1                | 7                    |
| Ledwidge 2003     | 0                    | 0                  | 0                  | 1                | 1               | 0               | 0                        | 1                   | 0                         | 1                | 4                    |
| Lucas 1998        | 0                    | 0                  | 1                  | 0                | 0               | 0               | 0                        | 0                   | 0                         | 0                | 1                    |
| Marusic 2013      | 0                    | 0                  | 1                  | 0                | 0               | 0               | 0                        | 0                   | 0                         | 0                | 1                    |
| McDonald 2001     | 0                    | 0                  | 0                  | 1                | 1               | 0               | 0                        | 1                   | 1                         | 1                | 5                    |
| McPhee 1983       | 0                    | 0                  | 0                  | 1                | 0               | 0               | 0                        | 0                   | 0                         | 0                | 1                    |
| Mejhert 2004      | 0                    | 0                  | 0                  | 1                | 1               | 0               | 0                        | 1                   | 0                         | 1                | 4                    |

|                 |   |   |   |   |   |   |   |   |   |   |   |
|-----------------|---|---|---|---|---|---|---|---|---|---|---|
| Mudge 2010      | 1 | 1 | 1 | 1 | 0 | 0 | 0 | 1 | 0 | 1 | 6 |
| Murray 2007     | 0 | 0 | 1 | 0 | 0 | 0 | 0 | 1 | 0 | 0 | 2 |
| Naylor 1994     | 1 | 1 | 0 | 1 | 1 | 1 | 0 | 1 | 1 | 0 | 7 |
| Nazareth 2001   | 0 | 0 | 1 | 1 | 1 | 0 | 0 | 1 | 0 | 1 | 5 |
| O'Dell 2005     | 0 | 0 | 1 | 1 | 0 | 0 | 0 | 0 | 0 | 0 | 2 |
| Ohuabunwa 2013  | 0 | 0 | 1 | 1 | 1 | 1 | 0 | 1 | 1 | 1 | 7 |
| Peikes 2012     | 0 | 0 | 1 | 1 | 1 | 1 | 0 | 1 | 1 | 1 | 7 |
| Rainville 1999  | 0 | 0 | 1 | 1 | 1 | 0 | 0 | 0 | 0 | 0 | 3 |
| Rich 1995       | 0 | 0 | 1 | 1 | 1 | 1 | 0 | 1 | 1 | 0 | 6 |
| Riegel 2002     | 0 | 0 | 1 | 0 | 1 | 1 | 0 | 1 | 0 | 1 | 5 |
| Smith 1995      | 0 | 0 | 0 | 0 | 1 | 0 | 0 | 1 | 0 | 1 | 3 |
| Sorknaes 2011   | 0 | 0 | 0 | 0 | 1 | 0 | 0 | 0 | 0 | 0 | 1 |
| Steeman 2006    | 0 | 0 | 0 | 1 | 0 | 1 | 0 | 0 | 1 | 0 | 3 |
| Stewart 1999    | 0 | 0 | 1 | 1 | 1 | 1 | 0 | 1 | 0 | 0 | 5 |
| Stromberg 2003  | 0 | 0 | 1 | 1 | 1 | 0 | 0 | 0 | 0 | 1 | 4 |
| Takahashi 2012  | 0 | 0 | 0 | 0 | 1 | 0 | 0 | 1 | 0 | 0 | 2 |
| Tsuyuki 2004    | 0 | 0 | 0 | 1 | 1 | 0 | 0 | 0 | 1 | 0 | 3 |
| Walker 2009     | 0 | 0 | 1 | 1 | 1 | 0 | 0 | 1 | 0 | 0 | 4 |
| Weinberger 1996 | 0 | 0 | 0 | 0 | 1 | 0 | 0 | 1 | 1 | 1 | 4 |
| Wong 2008       | 0 | 0 | 0 | 0 | 1 | 0 | 0 | 0 | 0 | 0 | 1 |
